# Supplementary material for: Genetic impacts on thermostability of onco-lncRNA HOTAIR during the development and progression of endometriosis
Source: PubMed Central journal article supplement (PMC7935326; doi:10.1371/journal.pone.0248168), 2021-03-05
Supplement: pone.0248168.s004.pdf [file pone.0248168.s004.pdf]

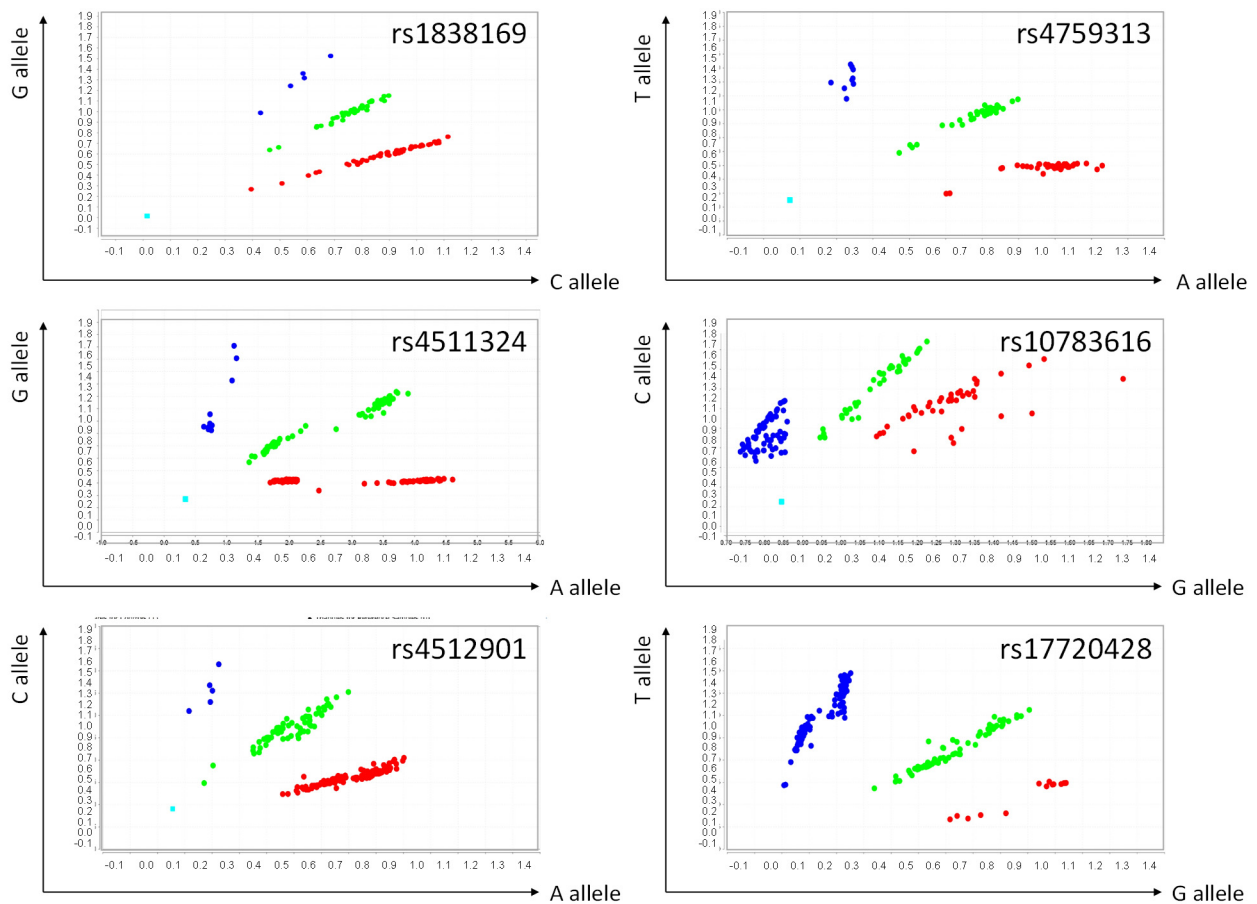

**S4 Fig. Allelic discrimination plots of the six functional single-nucleotide polymorphisms (SNPs) in *HOTAIR* gene.** DNA samples were prepared from PBMCs of patients and controls and genotyped by using *TaqMan* genotyping with probes listed in the S1 Table. The major (also the wild-type) and the minor alleles were detected either by 6-carboxyfluorescein (FAM)-labeled probes (blue) or by 2'-chloro-7'-phenyl-1,4-dichloro-6-carboxyfluorescein (VIC)-labeled probes (red). Samples with green dots indicate the heterozygous samples. "X" indicates the participant who failed to be genotyped.
