# Supplementary material for: Genetic impacts on thermostability of onco-lncRNA HOTAIR during the development and progression of endometriosis
Source: PubMed Central journal article supplement (PMC7935326; doi:10.1371/journal.pone.0248168), 2021-03-05
Supplement: pone.0248168.s005.pdf [file pone.0248168.s005.pdf]

Major allele ( $\Delta G$  : -35.2)

rs1838169

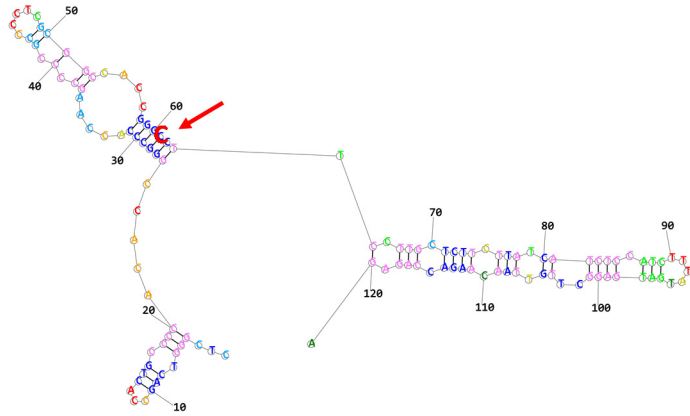

Minor allele ( $\Delta G$  : -37.2)

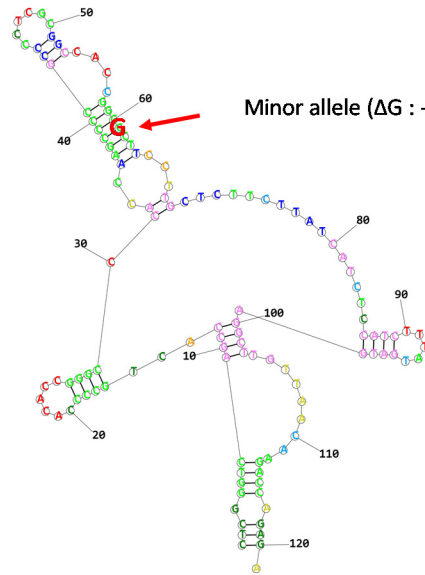

Major allele ( $\Delta G$  : -34.1)

rs4511324

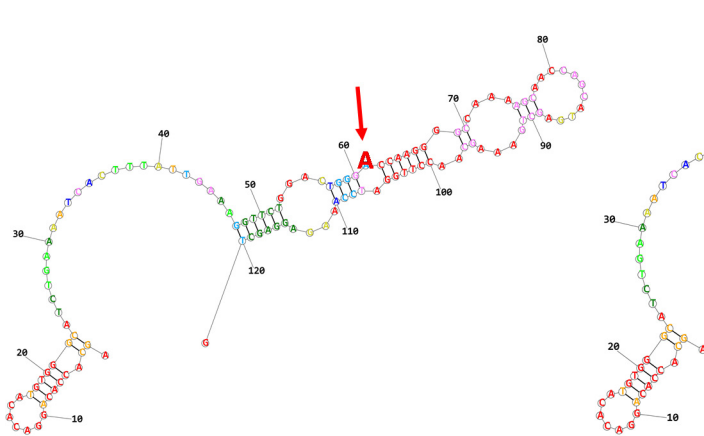

Minor allele ( $\Delta G$  : -34.7)

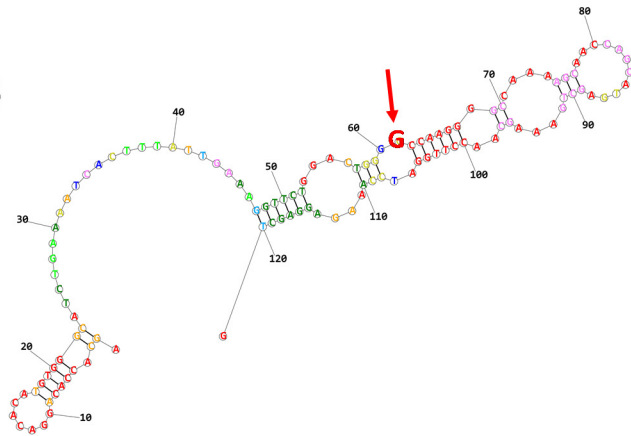

Major allele ( $\Delta G$  : -24.9)

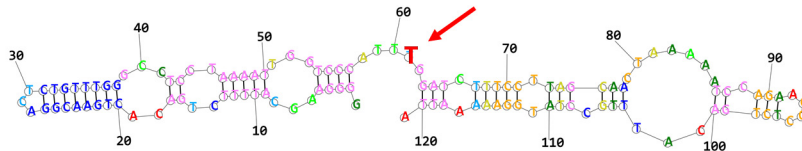

Minor allele ( $\Delta G$  : -25.4)

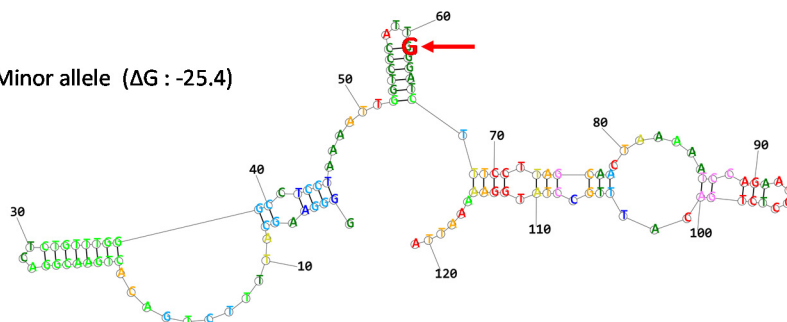

rs17720428

**S5 Fig. Functional impacts of endometriosis-related risk alleles (SNPs at rs1838169, rs4511324 and rs17720428) on HOTAIR RNA structure.** Partial RNA sequences with genetic substitutions at endometriosis-related risk SNPs (total 701 bp, the SNP site plus 350 bp upstream and 350 bp downstream sequences) were subjected to RNA stability/structure prediction by using MaxExpect (<http://rna.urmc.rochester.edu/RNAstructureWeb/Servers/Predict1/Predict1.html>) method[23]. Arrows indicate the reference major alleles and minor risk alleles for SNPs at rs1838169 (*upper* panel), rs4511324 (*middle*) and rs17720428 (*lower*).
