# Supplementary material for: Genetic impacts on thermostability of onco-lncRNA HOTAIR during the development and progression of endometriosis
Source: PubMed Central journal article supplement (PMC7935326; doi:10.1371/journal.pone.0248168), 2021-03-05
Supplement: pone.0248168.s007.pdf [file pone.0248168.s007.pdf]

**S1 Table.** Summary of the functional SNPs in *HOTAIR*

| SNP <sup>a</sup> | CHB MAF (%) | Major allele free energy (kcal/mol) <sup>b</sup> | Minor allele free energy (kcal/mol) <sup>b</sup> | $\Delta\Delta G$ (kcal/mol) | Location                               | ABI probe ID <sup>c</sup> |
|------------------|-------------|--------------------------------------------------|--------------------------------------------------|-----------------------------|----------------------------------------|---------------------------|
| rs1838169        | C: 84 G: 16 | -35.2                                            | -37.2                                            | -2.0                        | exon/non-coding transcript variant     | C__2104253_10             |
| rs4511324        | A: 76 G: 24 | -34.1                                            | -34.7                                            | -0.6                        | intron/upstream transcriptional region | C__27952483_10            |
| rs4512901        | A: 85 C: 15 | -23.9                                            | -19.7                                            | 4.2                         | intron/upstream transcriptional region | C__2104249_10             |
| rs4759313        | A: 75 T: 25 | -35.7                                            | -34.2                                            | 1.5                         | intron/enhancer region                 | C__29123986_10            |
| rs10783616       | G: 65 C: 35 | -37.0                                            | -32.8                                            | 4.2                         | intron/enhancer region                 | C__1124847_10             |
| rs17720428       | T: 85 G: 15 | -24.9                                            | -27.6                                            | -2.7                        | exon/non-coding transcript variant     | C__2104254_10             |
| rs920778         | A: 76 G: 24 | -14.8                                            | -14.8                                            | 0                           | intron                                 | F                         |
| rs7958904        | G: 71 C: 29 | -64.5                                            | -64.5                                            | 0                           | exon                                   | F                         |
| rs10783618       | C: 76 T: 24 | -29.0                                            | -29.3                                            | -0.3                        | intron                                 | F                         |

---

|             |       |       |       |       |      |                    |     |
|-------------|-------|-------|-------|-------|------|--------------------|-----|
| rs1899663   | C: 85 | A: 15 | -33.8 | -35.0 | -1.2 | intron             | N/A |
| rs2366151   | A: 76 | G: 24 | -23.7 | -24.9 | -1.2 | downstream variant | N/A |
| rs2366152   | A: 85 | G: 15 | -25.7 | -25.0 | 0.7  | exon               | N/A |
| rs10783617  | T: 75 | G: 25 | -24.5 | -25.4 | -0.9 | intron             | N/A |
| rs11170775  | A: 75 | G: 25 | -32.0 | -32.1 | -0.1 | intron             | F   |
| rs11170776  | G: 85 | T: 15 | -26.3 | -25.6 | 0.7  | upstream variant   | N/A |
| rs11613386  | A: 86 | G: 14 | -37.9 | -37.0 | 0.9  | upstream variant   | N/A |
| rs12312094  | C: 84 | G: 16 | -23.8 | -25.0 | -1.2 | exon               | N/A |
| rs17105613  | T: 85 | C: 15 | -33.4 | -34.4 | -1.0 | intron             | N/A |
| rs200349340 | G: 77 | T: 23 | -22.2 | -21.7 | 0.5  | exon               | N/A |

---

<sup>a</sup>SNPs in *HOTAIR* with a minor allele frequency (MAF) more than 10% in Beijing Chinese Han (CBH) population

<sup>b</sup>The predicted RNA structures and the estimated free energy were generated by MaxExpect method (<http://rna.urmc.rochester.edu/RNAstructureWeb/Servers/Predict1/Predict1.html>)

<sup>c</sup>SNPs with ABI probe IDs were selected for this study. F: failed to meet the criteria ( $\Delta\Delta G > 0.5$  or  $< -0.5$ ); N/A: no *Taqman* probe available
