# Supplementary material for: Genetic impacts on thermostability of onco-lncRNA HOTAIR during the development and progression of endometriosis
Source: PubMed Central journal article supplement (PMC7935326; doi:10.1371/journal.pone.0248168), 2021-03-05
Supplement: pone.0248168.s008.pdf [file pone.0248168.s008.pdf]

**S2 Table.** Primer sequences and amplification program for quantitative RT-PCR reactions in this study.

| <b>Gene name</b>             | <b>Reference sequence</b> | <b>Forward primer sequence<sup>a,b</sup></b> | <b>Reverse primer sequence<sup>a,b</sup></b> |
|------------------------------|---------------------------|----------------------------------------------|----------------------------------------------|
| <i>HOTAIR</i>                | NR_047517.1               | 5'- AATAGACATAGGAGAACA CTT -3'               | 5'- AATCTTAATAGCAGGAGGAA -3'                 |
| <i>HOXD10</i>                | NM_002148.4               | 5'- ATATACCTCAAGTAGACA -3'                   | 5'- GATTCTTCCTTAATGTTG -3'                   |
| <i>HOXA5</i>                 | NM_019102.4               | 5'- AAGTGTTCTGTCTCAATAGC -3'                 | 5'- TGTCTCATCAAGTCACCTCTA -3'                |
| <i>GAPDH</i>                 | NM_001289745              | 5'-CTCTGGTAAAGTGGATATTGT-3'                  | 5'-GGTGGAATCATATTGGAACA-3'                   |
| <i>ex-HOTAIR<sup>c</sup></i> | HOTAIR vectors            | 5'-AAGAACGCAATTTCAATGT-3'                    | 5'-CCGAATTAATACGACCACTA-3'                   |
| <i>puromycin</i>             | HOTAIR vectors            | 5'-GCTCGTAGAAGGGGAGGTTG-3'                   | 5'-ACAGATGGAAGGCCTCCTG-3'                    |

<sup>a</sup>The SYBR Green-based primers were designed by OligoArchitect<sup>TM</sup> online (<http://www.oligoarchitect.com/SYBRGreenSearchServlet>).

<sup>b</sup>QPCR cycles were performed by using an ABI 2720 Thermal Cycler (Applied Biosystems, Carlsband, CA) and the cycling conditions were: 95°C for 10 mins, followed by 40 cycles of 95°C for 15 seconds, 55°C for 15 seconds, 72°C for 15 seconds, and finally 72°C for 5 mins.

<sup>c</sup>The PCR reaction for ex-HOTAIR only detects exogenous HOTAIR expressed by the vector, but not endogenous HOTAIR because the primer set recognizes the joint region between 3'-end of HOTAIR and the vector backbone.
