# Supplementary material for: Genetic impacts on thermostability of onco-lncRNA HOTAIR during the development and progression of endometriosis
Source: PubMed Central journal article supplement (PMC7935326; doi:10.1371/journal.pone.0248168), 2021-03-05
Supplement: pone.0248168.s009.pdf [file pone.0248168.s009.pdf]

**S3 Table.** Primer sequences and PCR amplification program for site-directed mutagenesis in this study<sup>a,b,c</sup>

| SNP site                                                               | Forward primer sequence (5' to 3')             | Reverse primer sequence (5' to 3')             |
|------------------------------------------------------------------------|------------------------------------------------|------------------------------------------------|
| <b>Step-1 PCR to generate fragments A and B</b>                        |                                                |                                                |
| rs1838169-A                                                            | CGCCC <u>ACGTGA</u> AAGGCTGCCGAC               | ATAAGAAGAGCAAGGAAG <u>G</u> CCCGGTGGCCGCGAGGGG |
| rs1838169-B                                                            | CCCCTCGCGGCCACCGGG <u>C</u> CTTCCTTGCTCTTCTTAT | GTGTAACAGGCAGGTGGATTTCCTG                      |
| rs17720428-A                                                           | CGCCC <u>ACGTGA</u> AAGGCTGCCGAC               | CCTAAAATTGGTCCCA <u>G</u> TTGGATCTTTCCTTAGCAAC |
| rs17720428-B                                                           | GTTGCTAAGGAAAGATCC <u>CA</u> ATGGGACCAATTTTAGG | GTGTAACAGGCAGGTGGATTTCCTG                      |
| <b>Step-2 overlap extension PCR to join fragments A and B together</b> |                                                |                                                |
| rs1838169<br>&<br>rs17720428                                           | CGCCC <u>ACGTGA</u> AAGGCTGCCGAC<br>Pml1 site  | GTGTAACAGGCAGGTGGATTTCCTG<br>Aar1 site         |

<sup>a</sup>The bold letters with underlines in primers indicate the substitutive residues whereas the Italic letters with underlines indicate the restriction enzyme sites.

<sup>b</sup>For the Step-1 PCR, 0.1 ng wild type plasmid was utilized as the template for PCR. For the Step-2 overlap extension PCR, 10 ng fragments A and B were used as the template.

<sup>c</sup>PCR cycles were performed by using an ABI 2720 Thermal Cycler (Applied Biosystems, Carlsband, CA) and the cycling conditions were: 95°C for 10 mins, followed by 30 cycles of 95°C for 15 seconds, 55°C for 15 seconds, 72°C for 1 min, and finally 72°C for 5 mins.
