# Supplementary material for: Genetic impacts on thermostability of onco-lncRNA HOTAIR during the development and progression of endometriosis
Source: PubMed Central journal article supplement (PMC7935326; doi:10.1371/journal.pone.0248168), 2021-03-05
Supplement: pone.0248168.s010.pdf [file pone.0248168.s010.pdf]

**S4 Table.** Primer sequences and amplification program for PCR-based mycoplasma test.

| <b>Primer</b>                                              | <b>Primer sequence[26]</b> |
|------------------------------------------------------------|----------------------------|
| <i>Forward primer:</i> mixtures of the following 6 primers |                            |
| Myco-F1                                                    | CGCCTGAGTAGTACGTTTCGC      |
| Myco-F2                                                    | CGCCTGAGTAGTACGTACGC       |
| Myco-F3                                                    | TGCCTGAGTAGTACATTCGC       |
| Myco-F4                                                    | TGCCTGGGTAGTACATTCGC       |
| Myco-F5                                                    | CGCCTGGGTAGTACATTCGC       |
| Myco-F6                                                    | CGCCTGAGTAGTATGCTCGC       |
| <i>Reverse primer:</i> mixtures of the following 3 primers |                            |
| Myco-R1                                                    | GCGGTGTGTACAAGACCCGA       |
| Myco-R2                                                    | GCGGTGTGTACAAAACCCGA       |
| Myco-R3                                                    | GCGGTGTGTACAAACCCGA        |

**The PCR program:** initial denaturation at 95°C for 2 min; five cycles of 94°C-50°C-72°C, each step for 30 sec; thirty cycles of 94°C-56°C-72°C, each step for 30 sec.
