# Supplementary material for: Genetic impacts on thermostability of onco-lncRNA HOTAIR during the development and progression of endometriosis
Source: PubMed Central journal article supplement (PMC7935326; doi:10.1371/journal.pone.0248168), 2021-03-05
Supplement: pone.0248168.s011.pdf [file pone.0248168.s011.pdf]

**S5 Table.** Target sequences of siRNA vectors used in this study.

| siRNA vector <sup>a</sup> | Target sequence           |
|---------------------------|---------------------------|
| scramble                  | 5'-GGGTGAACTCACGTCAGAA-3' |
| siRNA-A                   | 780-GAGGAAAAGGGAAAATCTA   |
| siRNA-B                   | 801-GAACGGGAGTACAGAGAGA   |
| siRNA-C                   | 840-CCACATGAACGCCAGAGA    |
| siRNA-D                   | 1005-TAACAAGACCAGAGAGCTG  |

<sup>a</sup>Vector set of siRNAs (siRNA-A to siRNA-D) were designed to knockdown HOTAIR (NR\_003716) expression; scramble vector was used as the control.
